# Supplementary material for: Prenatal Influences on Size, Velocity and Tempo of Infant Growth: Findings from Three Contemporary Cohorts
Source: PubMed Central journal article supplement (PMC3937389; doi:10.1371/journal.pone.0090291), 2014-02-27
Supplement: pone.0090291.s002.pdf [file pone.0090291.s002.pdf]

TABLE S2. “Minimally-adjusted” estimated coefficients and 95% confidence interval for the association between covariates and size and velocity parameters by cohorts

|                                 | GXXI (n = 738)      |             |          |            |                                       |            |          |            | NINFEA (n = 2,925) |            |          |            |                                       |            |          |            | GOCS (n = 959)      |            |          |            |                                       |           |          |            |
|---------------------------------|---------------------|-------------|----------|------------|---------------------------------------|------------|----------|------------|--------------------|------------|----------|------------|---------------------------------------|------------|----------|------------|---------------------|------------|----------|------------|---------------------------------------|-----------|----------|------------|
|                                 | Adjusted for gender |             |          |            | Adjusted for gender & gestational age |            |          |            | Adjusted by gender |            |          |            | Adjusted for gender & gestational age |            |          |            | Adjusted for gender |            |          |            | Adjusted for gender & gestational age |           |          |            |
|                                 | Size                |             | Velocity |            | Size                                  |            | Velocity |            | Size               |            | Velocity |            | Size                                  |            | Velocity |            | Size                |            | Velocity |            | Size                                  |           | Velocity |            |
|                                 | %                   | 95%CI       | %        | 95%CI      | %                                     | 95%CI      | %        | 95%CI      | %                  | 95%CI      | %        | 95%CI      | %                                     | 95%CI      | %        | 95%CI      | %                   | 95%CI      | %        | 95%CI      | %                                     | 95%CI     | %        | 95%CI      |
| <b>Background</b>               |                     |             |          |            |                                       |            |          |            |                    |            |          |            |                                       |            |          |            |                     |            |          |            |                                       |           |          |            |
| Maternal height                 | 0.4                 | 0.2; 0.6    | 0.02     | -0.4; 0.4  | 0.4                                   | 0.2; 0.5   | 0.1      | -0.3; 0.5  | 0.4                | 0.4; 0.5   | 0.1      | -0.2; 0.1  | 0.4                                   | 0.3; 0.5   | 0.02     | -0.2; 0.2  | 0.3                 | 0.2; 0.4   | -0.1     | -0.4; 0.2  | 0.3                                   | 0.2; 0.4  | -0.1     | -0.4; 0.2  |
| Maternal age                    | -0.01               | -0.2; 0.2   | 0.3      | -0.1; 0.8  | 0.1                                   | -0.1; 0.2  | 0.2      | -0.2; 0.6  | -0.1               | -0.2; 0.1  | 0.1      | -0.2; 0.3  | 0.1                                   | -0.02; 0.2 | -0.2     | -0.5; 0.04 | 0.1                 | 0.00; 0.2  | -0.2     | -0.5; 0.04 | 0.2                                   | 0.1; 0.3  | -0.3     | -0.6; -0.1 |
| Maternal parity <sup>a</sup>    |                     |             |          |            |                                       |            |          |            |                    |            |          |            |                                       |            |          |            |                     |            |          |            |                                       |           |          |            |
| Nulliparous                     | 0                   | --          | 0        | --         | 0                                     | --         | 0        | --         | 0                  | --         | 0        | --         | 0                                     | --         | 0        | --         | 0                   | --         | 0        | --         | 0                                     | --        | 0        | --         |
| Parous                          | 3.5                 | 1.2; 5.7    | -2.9     | -7.9; 1.9  | 3.2                                   | 1.2; 5.1   | -2.4     | -6.9; 2.0  | 1.2                | 0.02; 2.3  | -1.6     | -4.4; 1.1  | 3.0                                   | 2.0; 4.0   | -5.7     | -8.2; -3.2 | 1.6                 | 0.2; 3.1   | -3.6     | -7.1; -0.1 | 2.3                                   | 0.9; 3.7  | -4.9     | -8.3; -1.6 |
| Maternal education <sup>b</sup> |                     |             |          |            |                                       |            |          |            |                    |            |          |            |                                       |            |          |            |                     |            |          |            |                                       |           |          |            |
| Low                             | 0                   | --          | 0        | --         | 0                                     | --         | 0        | --         | 0.9                | -1.5; 3.3  | -1.6     | -7.1; 4.0  | -1.3                                  | -3.5; 0.9  | 2.5      | -3.0; 7.9  | 0.4                 | -1.2; 2.1  | -4.2     | -8.1; -0.2 | 0.3                                   | -1.3; 1.9 | -3.7     | -7.4; 0.08 |
| Medium                          | 2.7                 | 0.0; 5.5    | -1.9     | -7.9; 4.1  | 3.4                                   | 1.0; 5.7   | -2.7     | -8.1; 2.7  | 0                  | --         | 0        | --         | 0                                     | --         | 0        | --         | 0                   | --         | 0        | --         | 0                                     | --        | 0        | --         |
| High                            | 0.2                 | -2.4; 2.8   | -0.8     | -6.6; 4.9  | 1.8                                   | -0.5; 4.1  | -3.8     | -8.9; 1.4  | -0.2               | -1.2; 0.9  | -1.4     | -3.9; 1.0  | -0.4                                  | -1.4; 0.6  | -1.1     | -3.5; 1.3  | -0.7                | -2.7; 1.2  | -0.9     | -5.6; 3.8  | -0.9                                  | -2.7; 1.0 | -0.6     | -5.0; 3.9  |
| <b>Intermediate</b>             |                     |             |          |            |                                       |            |          |            |                    |            |          |            |                                       |            |          |            |                     |            |          |            |                                       |           |          |            |
| Pre-pregnancy BMI               |                     |             |          |            |                                       |            |          |            |                    |            |          |            |                                       |            |          |            |                     |            |          |            |                                       |           |          |            |
| <18.5                           | -7.6                | -13.2; -2.1 | 8.8      | -3.5; 21.1 | -4.4                                  | -9.2; 0.5  | 2.5      | -8.6; 13.6 | -4.6               | -6.4; -2.8 | 5.3      | 1.0; 9.6   | -5.2                                  | -6.9; -3.6 | 6.8      | 2.6; 10.9  | -4.1                | -7.9; -0.3 | -4.8     | -13.9; 4.4 | -3.6                                  | -7.2; 1.0 | -5.9     | -14.7; 2.8 |
| 18.5-24.99                      | 0                   | --          | 0        | --         | 0                                     | --         | 0        | --         | 0                  | --         | 0        | --         | 0                                     | --         | 0        | --         | 0                   | --         | 0        | --         | 0                                     | --        | 0        | --         |
| 25+                             | 4.3                 | 1.8; 6.8    | -0.3     | -5.8; 5.2  | 3.4                                   | 1.2; 5.6   | 1.1      | -3.8; 6.1  | 2.5                | 1.2; 3.8   | -3.0     | -6.0; 0.01 | 2.1                                   | 0.9; 3.2   | -1.9     | -4.9; 0.9  | 1.6                 | -0.1; 3.4  | -0.7     | -5.0; 3.5  | 1.8                                   | 0.1; 3.5  | -1.4     | -5.4; 2.6  |
| Maternal Smoking <sup>c</sup>   |                     |             |          |            |                                       |            |          |            |                    |            |          |            |                                       |            |          |            |                     |            |          |            |                                       |           |          |            |
| No                              | 0                   | --          | 0        | --         | 0                                     | --         | 0        | --         | 0                  | --         | 0        | --         | 0                                     | --         | 0        | --         | 0                   | --         | 0        | --         | 0                                     | --        | 0        | --         |
| ≤1 <sup>st</sup> trimester      | -4.1                | -8.3; 0.1   | 5.9      | -3.3; 15.1 | -3.1                                  | -6.7; 0.5  | 4.1      | -4.1; 12.3 | 0.6                | -3.2; 4.4  | 4.1      | -4.8; 13.0 | 0.8                                   | -2.7; 4.3  | 3.4      | -5.2; 12.0 | -1.7                | -4.2; 0.9  | -0.5     | -6.5; 5.6  | -0.9                                  | -3.3; 1.5 | -3.1     | -8.9; 2.7  |
| >1 <sup>st</sup> trimester      | -3.3                | -6.5; -0.04 | 11.6     | 4.4; 18.7  | -4.1                                  | -6.8; -1.3 | 12.8     | 6.4; 19.1  | -2.1               | -4.1; -0.1 | 6.1      | 1.3; 10.9  | -2.9                                  | -4.8; -1.1 | 8.2      | 3.6; 12.9  |                     |            |          |            |                                       |           |          |            |
| Gestational diabetes            |                     |             |          |            |                                       |            |          |            |                    |            |          |            |                                       |            |          |            |                     |            |          |            |                                       |           |          |            |
| No                              | 0                   | --          | 0        | --         | 0                                     | --         | 0        | --         | 0                  | --         | 0        | --         | 0                                     | --         | 0        | --         | 0                   | --         | 0        | --         | 0                                     | --        | 0        | --         |
| Yes                             | 1.4                 | -2.9; 5.8   | -0.8     | -10.5; 8.9 | 0.9                                   | -3.0; 4.7  | 0.5      | -8.2; 9.3  | 0.4                | -1.5; 2.3  | -1.9     | -6.2; 2.5  | 1.3                                   | -0.4; 3.1  | -3.7     | -8.0; 0.5  | 2.4                 | -0.9; 5.7  | -1.9     | -9.9; 5.9  | 3.1                                   | -0.1; 6.2 | -3.7     | -11.3; 3.4 |
| Gestational hypertension        |                     |             |          |            |                                       |            |          |            |                    |            |          |            |                                       |            |          |            |                     |            |          |            |                                       |           |          |            |
| No                              | 0                   | --          | 0        | --         | 0                                     | --         | 0        | --         | 0                  | --         | 0        | --         | 0                                     | --         | 0        | --         | 0                   | --         | 0        | --         | 0                                     | --        | 0        | --         |
| Yes                             | -8.3                | -13.7; -2.9 | 19.4     | 7.6; 31.3  | -3.0                                  | -7.8; 1.9  | 9.7      | -1.2; 20.6 | -5.4               | -7.3; -3.6 | 12.4     | 8.1; 16.7  | -3.1                                  | -4.7; -1.5 | 8.2      | 4.3; 12.1  | 0.7                 | -1.8; 3.2  | 0.6      | -5.3; 6.5  | 1.5                                   | -0.8; 3.9 | -1.2     | -6.9; 4.4  |

<sup>a</sup> In GOCS child order was used as a proxy for parity

<sup>b</sup> GXXI: Low=≤9 years, Medium=≤12 years, High=Degree or higher; NINFEA: Low= ≤Secondary school, Medium=High school, High=Degree or higher ; GOCS: Low= None/Primary/Secondary school, Medium=High school, High=High School + technical education or higher

<sup>c</sup> In GOCS smoking during pregnancy was categorized as No/Rarely vs. Frequently
